# Supplementary material for: HIV Capsid is a Tractable Target for Small Molecule Therapeutic Intervention
Source: PLOS journal article supplement (doi:10.1371/journal.ppat.1001220), 2010-12-09
Supplement: S1 (10.1371/journal.ppat.1001220.s001) [file journal.ppat.1001220.s001]

**Table S1:** *In Vitro* Antiviral Activity of PF-3450074 Against Different HIV-1 Clinical Isolates or Laboratory Strains in PBMCs<sup>a</sup>. Supplementary to Figure 1, the properties of the various isolates tested (represented by single points) against the compound are shown.

| HIV-1 Isolate | Clade <sup>b</sup> | Receptor | EC <sub>50</sub> (μM) | TI <sup>c</sup> |
|---------------|--------------------|----------|-----------------------|-----------------|
| NL4-3         | B                  | X4       | 0.64 ± 0.10           | > 16            |
| BaL           | B                  | R5       | 0.26 ± 0.08           | > 38            |
| SF162         | B                  | R5       | 0.25 ± 0.11           | > 40            |
| 92HT599       | B                  | R5/X4    | 0.08 (0.04, 0.12)     | > 25            |
| 92HT596       | B                  | R5/X4    | 0.25 (0.38, 0.12)     | > 26            |
| 92BR004       | B                  | R5       | 0.19 (0.34, 0.04)     | > 29            |
| 92UG037       | A                  | R5       | 0.32 ± 0.18           | > 32            |
| 94UG118       | D                  | R5       | 0.23 (0.14, 0.33)     | > 31            |
| 97ZA003       | C                  | R5       | 0.20 (0.19, 0.21)     | > 47            |
| CMU06         | E                  | X4       | 0.14 (0.16, 0.12)     | > 61            |

<sup>a</sup>Antiviral activity was determined by measuring RT activity 7 days after infection of PBMCs with HIV-1 clinical isolates (X4, CXCR4; R5, CCR5).

<sup>b</sup>Clade and receptor assignments based on designations from the NIH AIDS Research and Reference Reagent Program or our collaborator for the study (SRI).

<sup>c</sup>TI, therapeutic index calculated by dividing the mean EC<sub>50</sub> value into the mean CC<sub>50</sub> value determined in PBMCs (>10 microM).
