# Supplementary material for: HIV Capsid is a Tractable Target for Small Molecule Therapeutic Intervention
Source: PLOS journal article supplement (doi:10.1371/journal.ppat.1001220), 2010-12-09
Supplement: S2 (10.1371/journal.ppat.1001220.s002) [file journal.ppat.1001220.s002]

**Table S2:** *In Vitro* Antiviral Activity of PF-3759857 Against Different HIV-1 Clinical Isolates or Laboratory Strains in PBMCs<sup>a</sup>. Supplementary to Figure 1, the properties of the various isolates tested (represented by single points) against the compound are shown.

| HIV-1 Isolate | Clade <sup>b</sup> | Receptor | EC <sub>50</sub> (μM) | TI <sup>c</sup> |
|---------------|--------------------|----------|-----------------------|-----------------|
| IIIB          | B                  | X4       | 1.36                  | >73.7           |
| JR-CSF        | B                  | R5       | 1.19                  | >84.0           |
| 92BR014       | B                  | R5/X4    | 3.17                  | >31.5           |
| 92BR021       | B                  | R5       | 1.25                  | >80.0           |
| 92BR025       | C                  | R5       | 1.08                  | >92.4           |
| 92BR020       | B                  | R5       | 1.55                  | >64.7           |
| 92RW016       | A                  | R5       | 1.14                  | >87.9           |
| 92TH014       | B                  | R5       | 1.34                  | >74.6           |
| 92TH026       | B                  | R5       | 1.94                  | >51.4           |
| 93BR017       | B                  | R5       | 1.62                  | >61.9           |
| 93BR020       | F                  | R5/X4    | 1.03                  | >97.1           |
| 93BR021       | B                  | R5       | 0.60                  | >166            |
| 93BR023       | B                  | R5       | 0.77                  | >130            |
| 96USHIPS7     | B                  | R5       | 1.03                  | >97.1           |
| 91US056       | B                  | R5       | 1.76                  | >56.8           |
| 92US076       | B                  | R5       | 1.03                  | >96.8           |
| 98IN017       | C                  | X4       | 0.51                  | >196            |
| 93IN101       | C                  | R5       | 1.01                  | >99.3           |

<sup>a</sup>Antiviral activity was determined by measuring RT activity 7 days after infection of PBMCs with HIV-1 clinical isolates. (X4, CXCR4; R5, CCR5).

<sup>b</sup>Clade and receptor assignments based on designations from the NIH AIDS Research and Reference Reagent Program or our collaborator for the study (SRI).

<sup>c</sup>TI, therapeutic index calculated by dividing the mean EC<sub>50</sub> value into the mean CC<sub>50</sub> value determined in PBMCs (>100 microM).
