# Supplementary material for: HIV Capsid is a Tractable Target for Small Molecule Therapeutic Intervention
Source: PLOS journal article supplement (doi:10.1371/journal.ppat.1001220), 2010-12-09
Supplement: S5 (10.1371/journal.ppat.1001220.s005) [file journal.ppat.1001220.s005]

**Table S5:** Conservation of capsid binding site residues across HIV-1 strains

| <i>N-terminal domain binding site residues</i> |                     |                                    |
|------------------------------------------------|---------------------|------------------------------------|
| <b>Residue</b>                                 | <b>Conservation</b> | <b>Other residues (% observed)</b> |
| N53                                            | 99.4%               | X(0.6%)                            |
| L56                                            | 99.4%               | X(0.6%)                            |
| N57                                            | 99.4%               | X(0.6%)                            |
| V59                                            | 99.4%               | I(0.6%)                            |
| Q63                                            | 100%                | -                                  |
| M66                                            | 95.2%               | L(4.8%)*                           |
| Q67                                            | 98.8%               | E(1.2%)                            |
| L69                                            | 100%                | -                                  |
| K70                                            | 99.4%               | E(0.6%)*                           |
| I73                                            | 100%                | -                                  |
| A105                                           | 98.8%               | X(0.6%), V(0.6%)                   |
| T107                                           | 96.4%               | A(1.8%), S(1.8%)                   |
| Y130                                           | 100%                | -                                  |
| <i>Putative C-terminal contact residues</i>    |                     |                                    |
| <b>Residue</b>                                 | <b>Conservation</b> | <b>Other residues (% observed)</b> |
| Y169                                           | 35%                 | F(65%)                             |
| L172                                           | 99.4%               | I(0.6%)                            |
| R173                                           | 100%                | -                                  |
| Q179                                           | 99.4%               | H(0.6%)                            |
| K182                                           | 100%                | -                                  |

Sequence data taken from 2009 HIV-1 sequence compendium  
 (<http://www.hiv.lanl.gov/content/sequence/HIV/COMPENDIUM/2009compendium.html>) comprising  
 164 representative sequences from different viral strains

\*All from O genotype
